# Supplementary material for: Liposome-Encapsulated Tobramycin and IDR-1018 Peptide Mediated Biofilm Disruption and Enhanced Antimicrobial Activity against Pseudomonas aeruginosa
Source: MDPI journal article supplement (doi:10.3390/pharmaceutics14050960), 2022-04-28
Supplement: s1 [file s1]

# Supplementary Materials:

## Liposome-Encapsulated Tobramycin and IDR-1018 Peptide Mediated Biofilm Disruption and Enhanced Antimicrobial Activity against *Pseudomonas aeruginosa*

Nouf M. Alzahrani <sup>1</sup>, Rayan Y. Booq <sup>1</sup>, Ahmad M. Aldossary <sup>1</sup>, Abrar A. Bakr <sup>1</sup>, Fahad A. Almughem <sup>1</sup>, Ahmed J. Alfahad <sup>1</sup>, Wijdan K. Alsharif <sup>1</sup>, Somayah J. Jarallah <sup>1</sup>, Waleed S. Alharbi <sup>2</sup>, Samar A. Alsudir <sup>1</sup>, Essam J. Alyamani <sup>1</sup>, Essam A. Tawfik <sup>1,\*</sup> and Abdullah A. Alshehri <sup>1,\*</sup>

*Tobramycin Determination and Quantification using Ultra-High-Performance Liquid Chromatography-Tandem Mass Spectrometer (UHPLC-MS/MS)*

To quantify tobramycin in the drug-loaded liposomes, a UHPLC method was developed. Both the regression equation and  $R^2$  for tobramycin were determined to be  $y = 33295x - 7E+06$  and  $R^2 = 0.9928$ , respectively, indicating good linearity of this method at a concentration range of 1000-200 ppb.

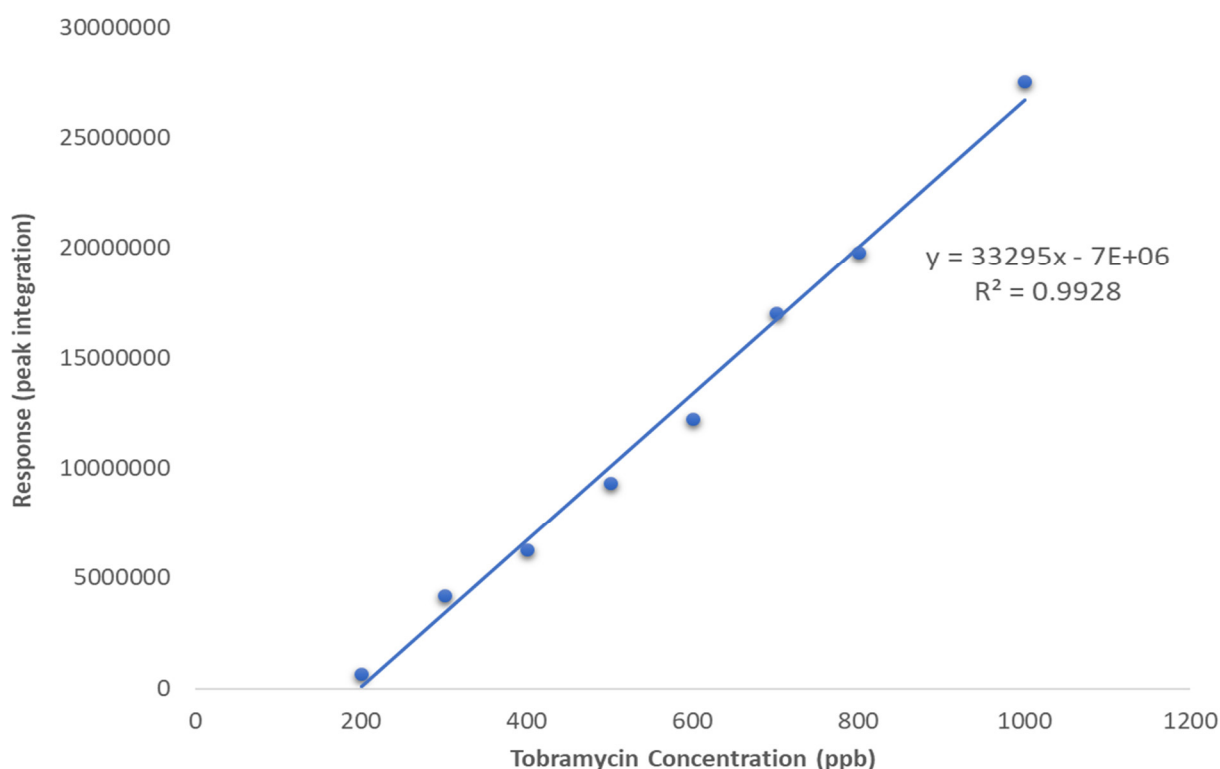

**Figure S1.** The UHPLC calibration curve of tobramycin shows good linearity ( $R^2 = 0.9928$ ). The regression equation of tobramycin at a concentration range of 1000-200 ppb is  $y = 33295x - 7E+06$ .
